# Supplementary material for: Vapor-phase assisted hydrothermal carbon from sucrose and its application in acid catalysis
Source: Royal Society of Chemistry journal article supplement (doi:10.1039/c7gc02236k), 2018-01-01
Supplement: c7gc02236k1.pdf [file c7gc02236k1.pdf]

## ELECTRONIC SUPPORTING INFORMATION

### *Vapor-phase assisted hydrothermal carbon from sucrose and its application in acid catalysis*

Ruyi Zhong,<sup>a</sup> Yuhe Liao,<sup>a</sup> Riyang Shu,<sup>b</sup> Longlong Ma<sup>b</sup> and Bert F. Sels<sup>a,\*</sup>

<sup>a</sup>Center for Surface Chemistry and Catalysis, KU Leuven, Corelab, Celestijnenlaan 200F, 3001 Heverlee, Belgium.

<sup>b</sup>Key Laboratory of Renewable Energy, Guangzhou Institute of Energy Conversion, Chinese Academy of Sciences, Guangzhou 510640, China.

**Table S1. Elemental and surface compositions of hydrothermal and sulfonated carbons.**

| Sample                                              | Elemental composition |          |         |           |           | Surface composition |          |           |
|-----------------------------------------------------|-----------------------|----------|---------|-----------|-----------|---------------------|----------|-----------|
|                                                     | C (wt.%)              | H (wt.%) | O (wt.) | H/C (at.) | O/C (at.) | C (at.%)            | O (at.%) | O/C (at.) |
| <i>Sucrose HT</i>                                   | 69.1                  | 5.2      | 25.4    | 0.899     | 0.275     | 78.8                | 21.2     | 0.269     |
| <i>Sucrose in H<sub>2</sub>O HT</i>                 | 66.2                  | 5.0      | 28.7    | 0.907     | 0.326     | 79.7                | 20.3     | 0.254     |
| <i>Sucrose HT SO<sub>3</sub>H</i>                   | 54.1                  | 3.0      | 41.1    | 0.672     | 0.570     | 72.6                | 27.1     | 0.374     |
| <i>Sucrose in H<sub>2</sub>O HT SO<sub>3</sub>H</i> | 51.9                  | 3.1      | 43.6    | 0.726     | 0.631     | 73.0                | 26.8     | 0.367     |

**Table S2. The yield of FMBM and conversion of furfural at 24 h for control experiments.**

| Catalyst                            | Yield of FMBM at 24 h (%) | Conversion of furfural at 24 h (%) |
|-------------------------------------|---------------------------|------------------------------------|
| <i>Blank</i>                        | 0.0                       | 1.8                                |
| <i>Sucrose HT</i>                   | 0.4                       | 2.1                                |
| <i>Sucrose in H<sub>2</sub>O HT</i> | 0.2                       | 1.7                                |

A significant conversion should be measured in presence of the sulfonate-free carbon material in case the internal standard (naphthalene) strongly adsorbs on the carbon material. The data shows for both non-sulfonated carbon samples that the yield of FMBM is close to zero and the conversion of furfural is very low and similar to that of the reaction without solid carbon. These results therefore exclude the preferential adsorption of internal standard naphthalene over the other chemicals in the reaction system.

### TGA FOR DRYING AT 100 °C OVERNIGHT

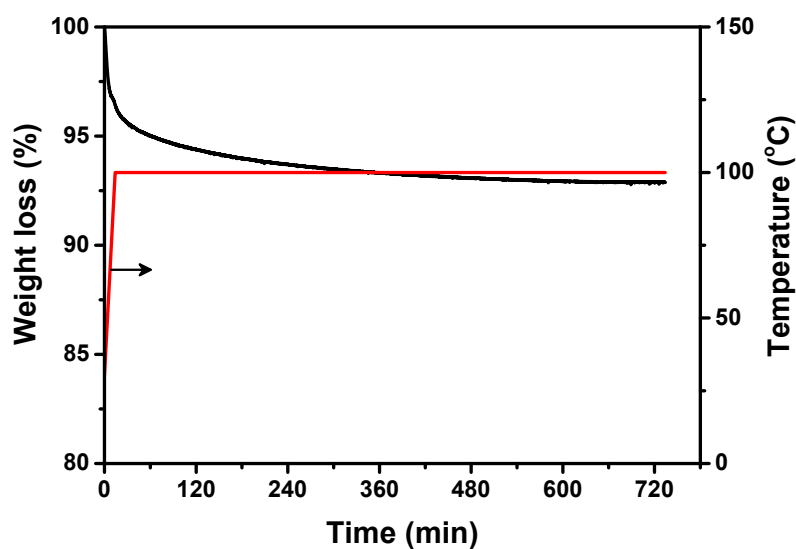

**Figure S1.** Weight loss of *Sucrose in H<sub>2</sub>O HT* in air during the temperature program (red line).

The weight loss curve comes to a plateau after about 10 h, with 7.2 wt% loss of H<sub>2</sub>O, which corresponds well with the weight loss around 150 °C during TGA measurement (5 °C min<sup>-1</sup> from room temperature to 800 °C in O<sub>2</sub>). This result confirms that drying 100 °C overnight in air is sufficient for the hydrothermal carbon to remove H<sub>2</sub>O.

## FTIR

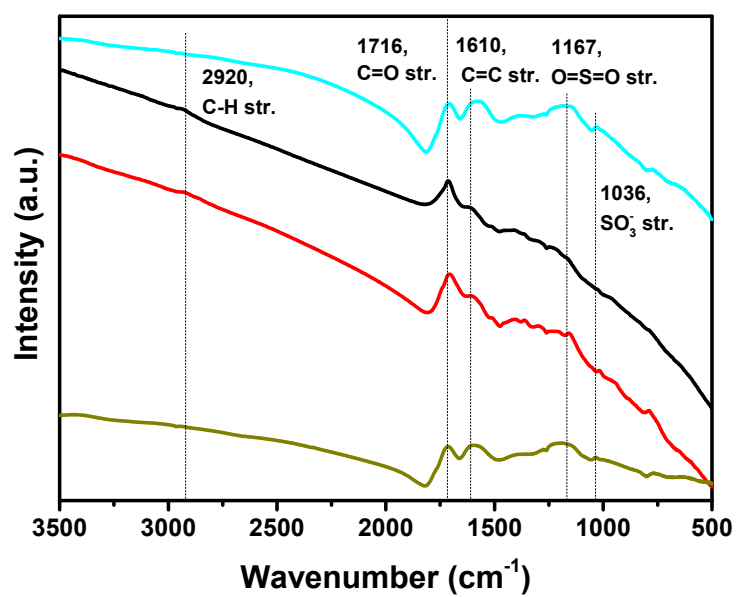

**Figure S2.** FTIR spectra of *Sucrose HT* (black), *Sucrose in  $\text{H}_2\text{O}$  HT* (red), *Sucrose HT  $\text{SO}_3\text{H}$*  (dark yellow) and *Sucrose in  $\text{H}_2\text{O}$  HT  $\text{SO}_3\text{H}$*  (cyan).

## RAMAN

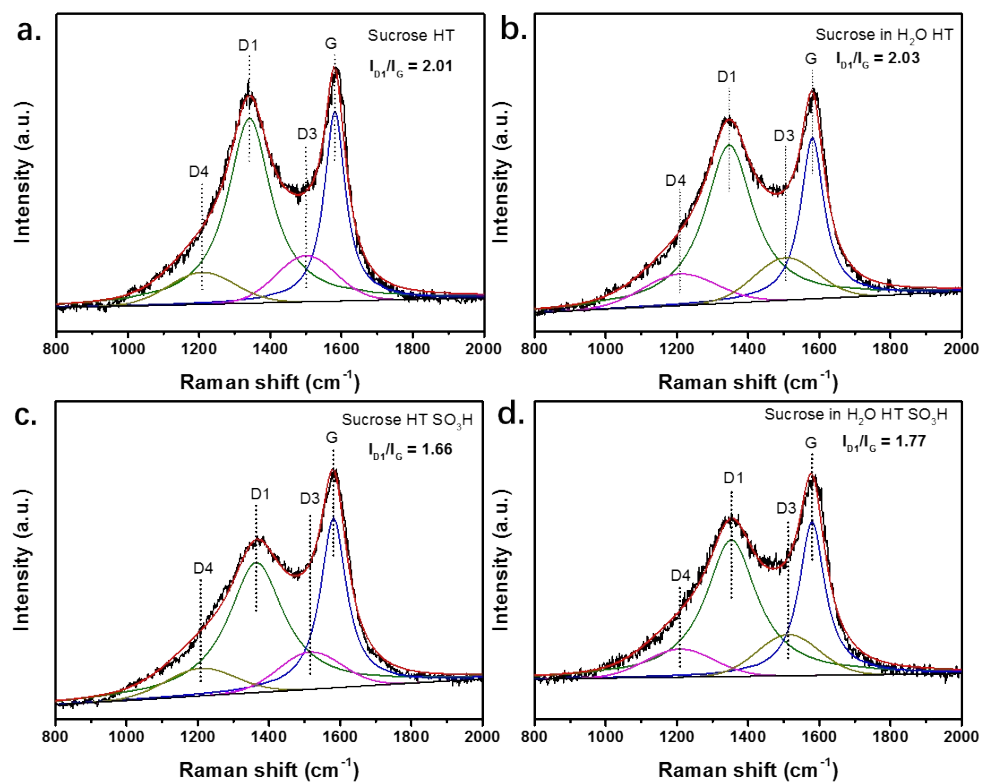

**Figure S3.** Raman spectra of (a) *Sucrose HT*, (b) *Sucrose in H<sub>2</sub>O HT*, (c) *Sucrose HT SO<sub>3</sub>H* and (d) *Sucrose in H<sub>2</sub>O HT SO<sub>3</sub>H*.

## XPS

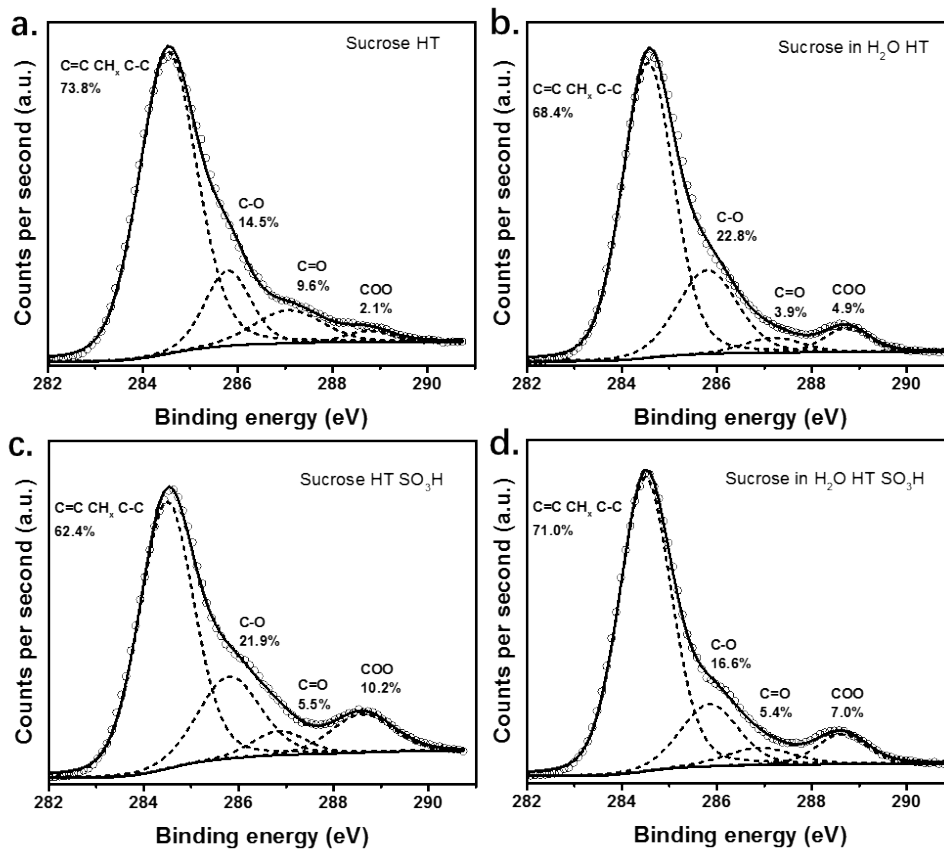

**Figure S4.** C 1s core-level spectra of (a) *Sucrose HT*, (b) *Sucrose in H<sub>2</sub>O HT*, (c) *Sucrose HT SO<sub>3</sub>H* and (d) *Sucrose in H<sub>2</sub>O HT SO<sub>3</sub>H*. The numbers are the area percentages of deconvoluted individual peaks in the overall peak area.

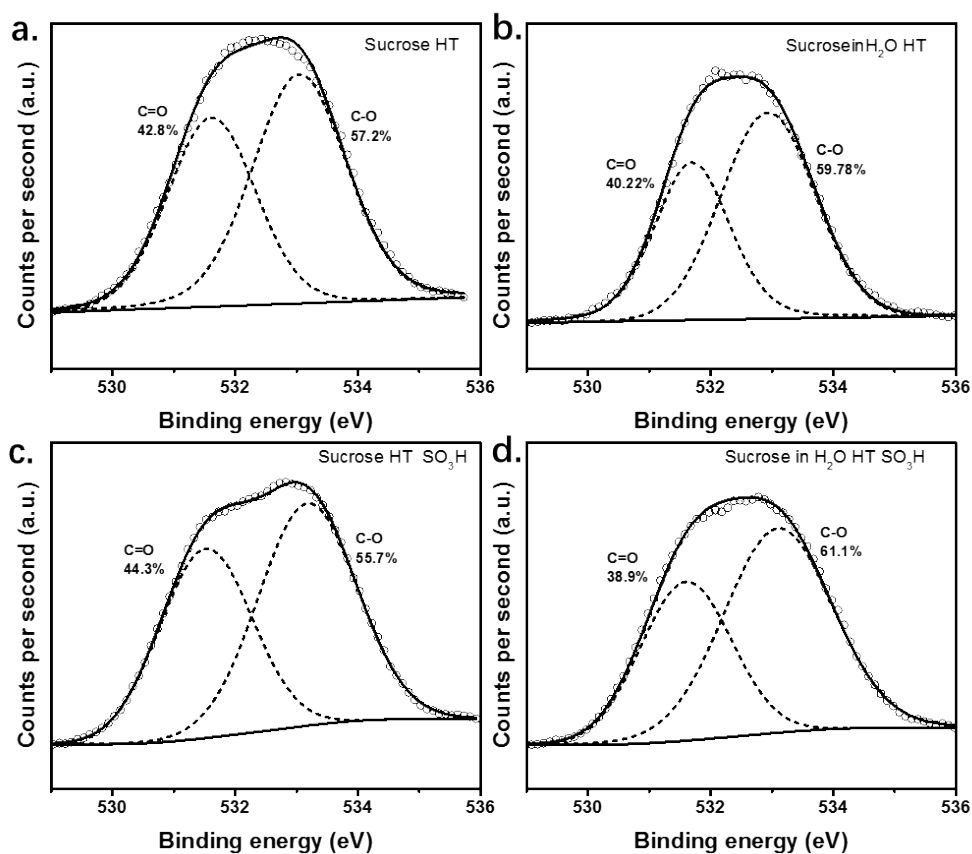

**Figure S5.** O 1s core-level spectra of (a) *Sucrose HT*, (b) *Sucrose in  $H_2O$  HT*, (c) *Sucrose HT  $SO_3H$*  and (d) *Sucrose in  $H_2O$  HT  $SO_3H$* . The numbers are the area percentages of deconvoluted individual peaks in the overall peak area.

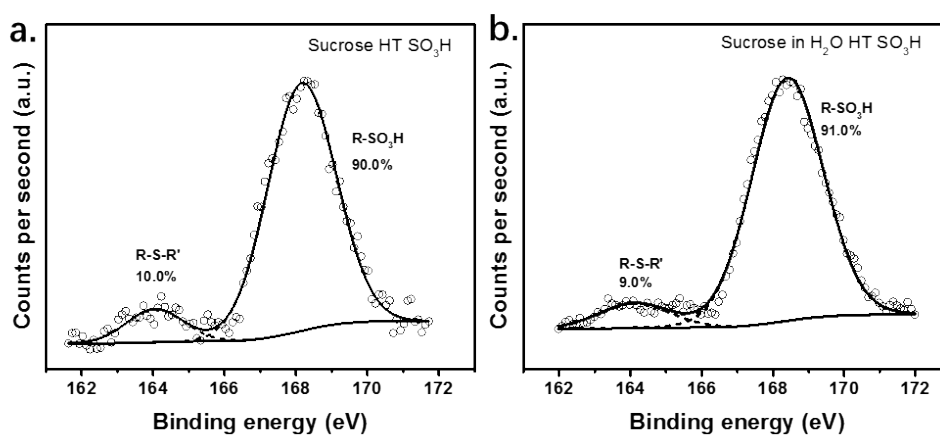

**Figure S6.** S 2p core-level spectra of (a) *Sucrose HT  $SO_3H$*  and (b) *Sucrose in  $H_2O$  HT  $SO_3H$* . The numbers are the area percentages of deconvoluted individual peaks in the overall peak area.

## NMR

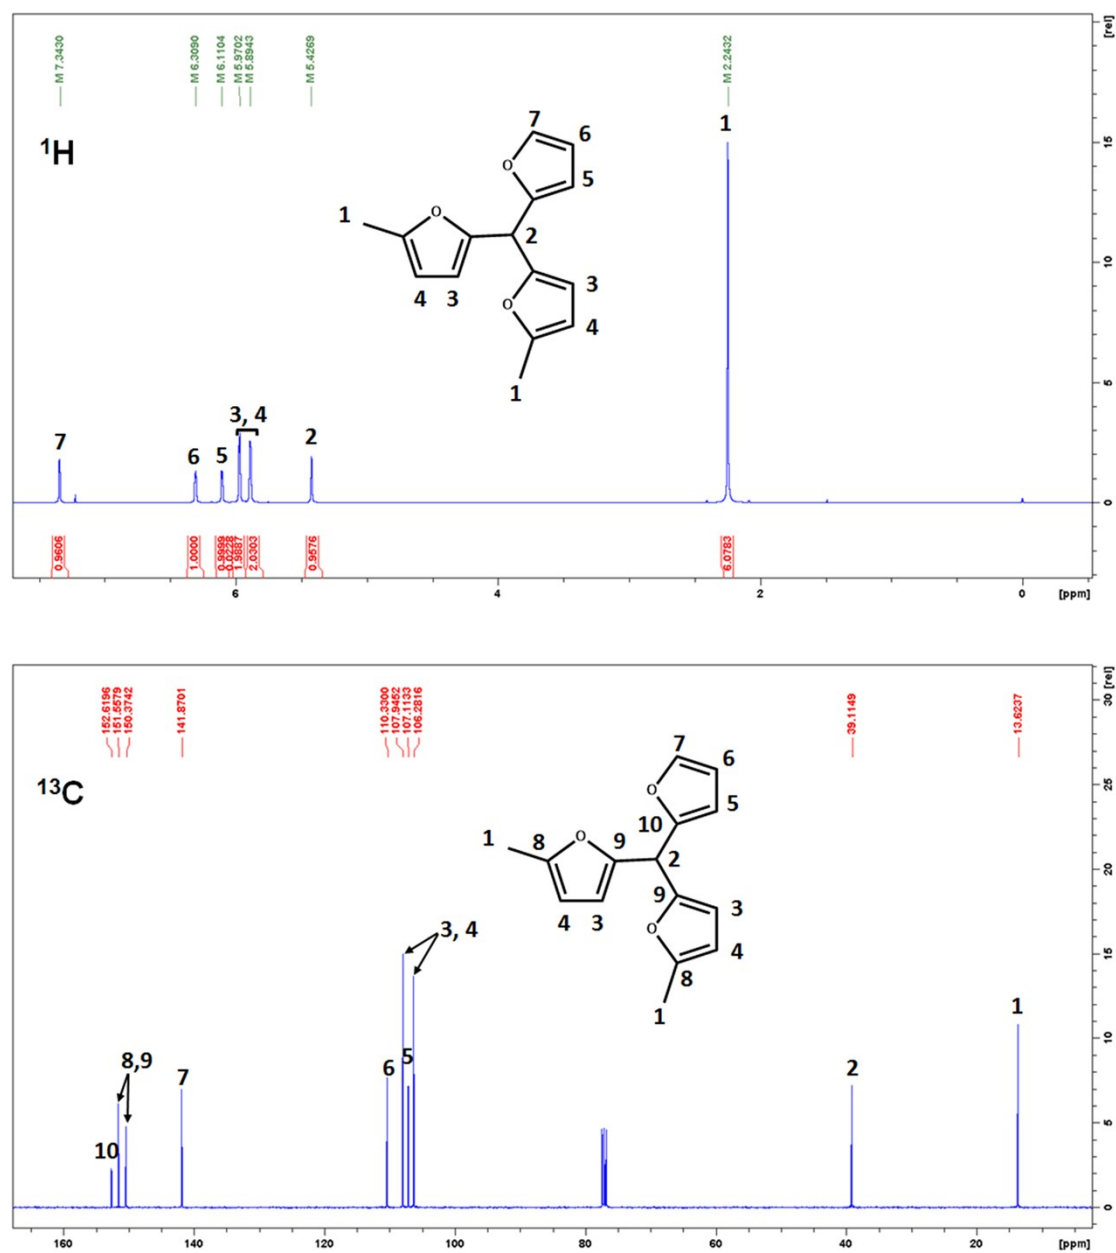

**Figure S7.** <sup>1</sup>H and <sup>13</sup>C NMR spectra of the product of 2-methylfuran condensation with furfural over Amberlyst 15 (dry form) at 50 °C for 24 h, after evaporating the lights (mainly unreacted reagents) with a rotary evaporator under 35 mbar at 65 °C to remove the excess 2-methyl furan and formed H<sub>2</sub>O.
